# Supplementary material for: Fractionation of sulphur relative to iron during laser ablation-ICP-MS analyses of sulphide minerals: implications for quantification
Source: Royal Society of Chemistry journal article supplement (doi:10.1039/c4ja00012a), 2014-01-01

### Criteria for determining the amount of melting around the ablation craters:

The ablation craters for each mineral were imaged using a FE-SEM. The craters from the UP213 and 193-Ex lasers were ablated with ~100 µm beam size for 300 laser pulses at 4.2 J/cm<sup>2</sup> and 2.7 J/cm<sup>2</sup> respectively. The craters in each mineral were ranked based on the amount of melting using the following criteria: roundness of the crater, slope of the walls, evidence of solidified melt on and around the rim and cooling cracks on the base. For each criteria a value of 0 indicated little or no evidence of melting and a value of 4 indicated high levels of melting, giving a maximum cumulative value of 20.

#### Amount of Melting 193-Exi:

| Mineral      | Shape of crater | Slope of crater walls | Melt on base | Melt on rim | Melt ejecta | Total |
|--------------|-----------------|-----------------------|--------------|-------------|-------------|-------|
| Pyrite       | 0               | 0                     | 0            | 0           | 1           | 1     |
| Sphalerite   | 0               | 0                     | 0            | 1           | 0           | 1     |
| Pyrrhotite   | 0               | 1                     | 1            | 2           | 1           | 5     |
| Pentlandite  | 0               | 2                     | 1            | 2           | 1           | 6     |
| Chalcopyrite | 2               | 1                     | 3            | 2           | 2           | 10    |
| Bornite      | 1               | 3                     | 2            | 3           | 2           | 11    |
| Tetrahedrite | 3               | 3                     | 3            | 3           | 3           | 15    |

#### Amount of Melting UP213:

| Mineral      | Shape of crater | Slope of crater walls | Melt on base | Melt on rim | Melt ejecta | Total |
|--------------|-----------------|-----------------------|--------------|-------------|-------------|-------|
| Pyrite       | 0               | 0                     | 0            | 0           | 1           | 1     |
| Sphalerite   | 0               | 0                     | 1            | 1           | 0           | 2     |
| Pyrrhotite   | 0               | 2                     | 2            | 2           | 1           | 7     |
| Pentlandite  | 1               | 2                     | 1            | 2           | 2           | 8     |
| Chalcopyrite | 2               | 3                     | 3            | 2           | 3           | 13    |
| Bornite      | 3               | 4                     | 4            | 3           | 2           | 16    |
| Tetrahedrite | 3               | 4                     | 4            | 3           | 3           | 17    |

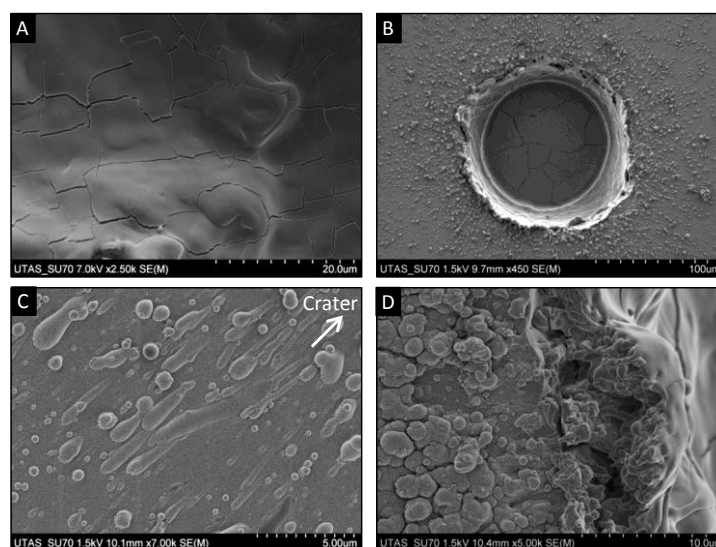

**Examples of melting.** Secondary electron images of melting in and around the ablation craters. A) cooling crack on the base of crater, pyrrhotite; B) sloping crater walls, bornite; C) spattered melt droplets proximal to the crater, tetrahedrite; D) melting on the crater rim, pentlandite.

**Ablation craters from the 193-Exi laser:**

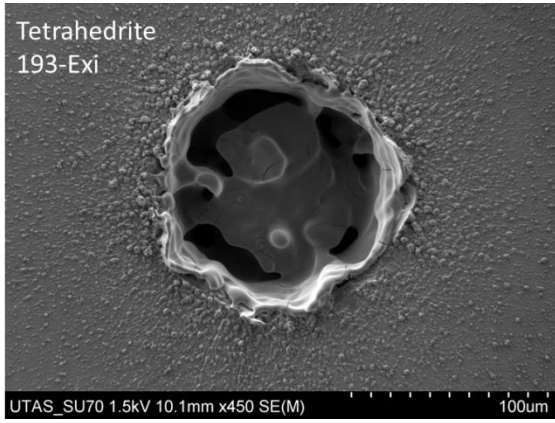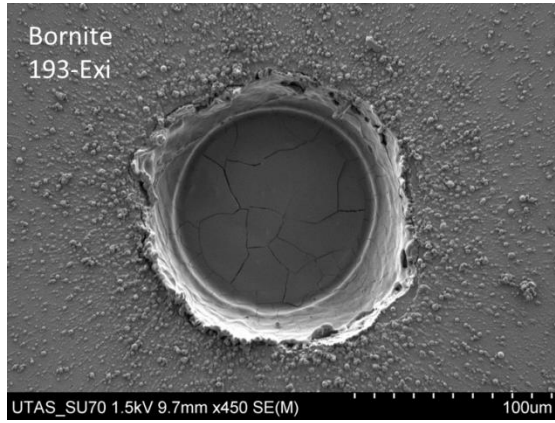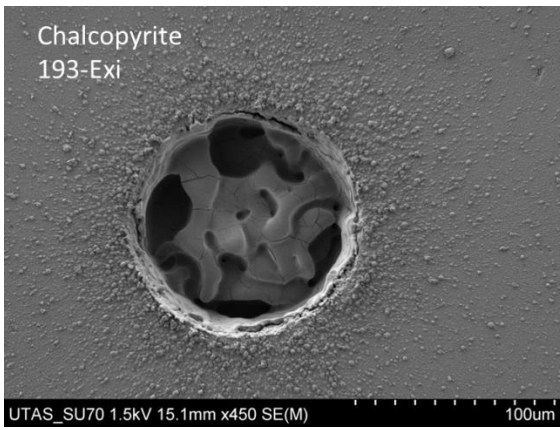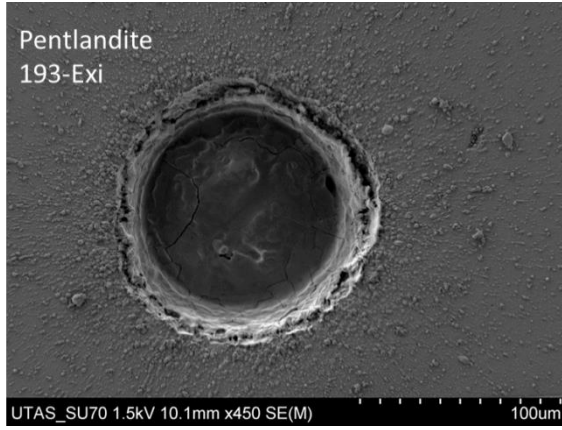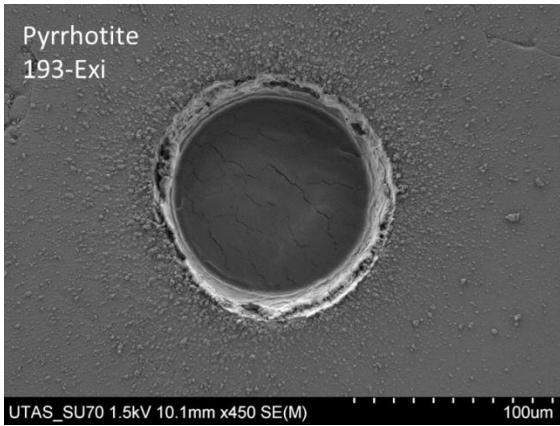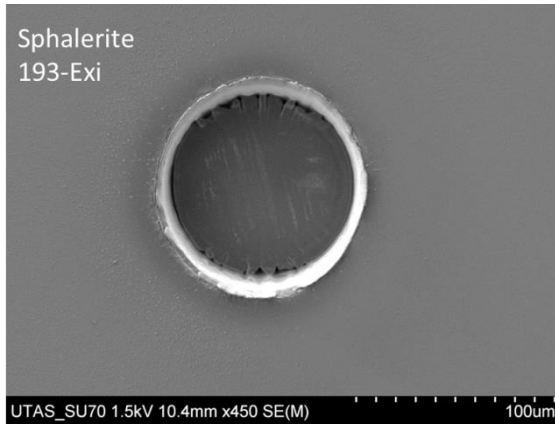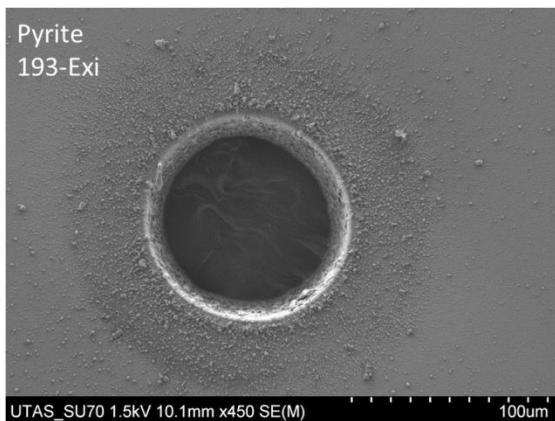

**Ablation craters from the UP213 laser:**

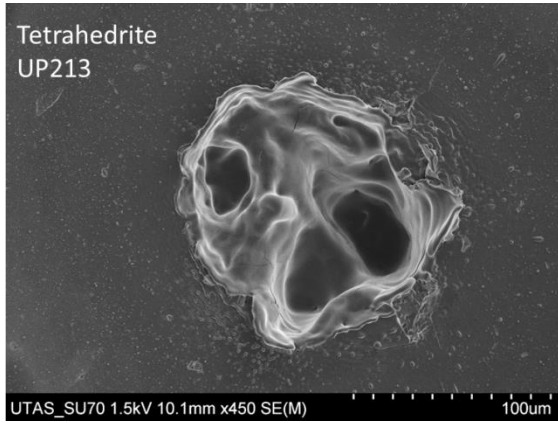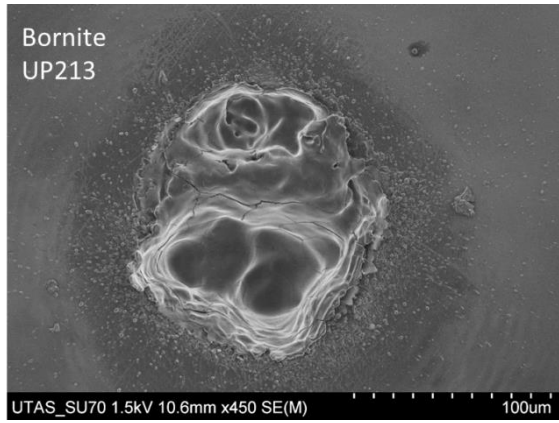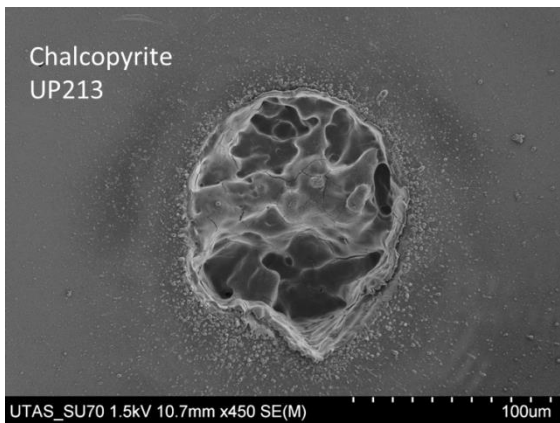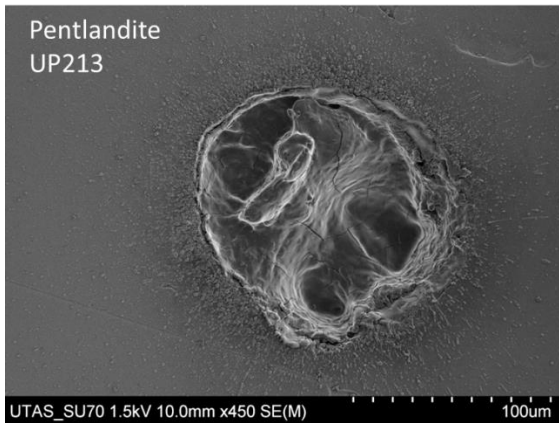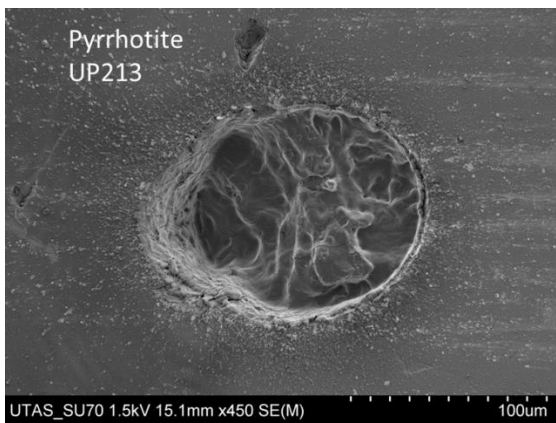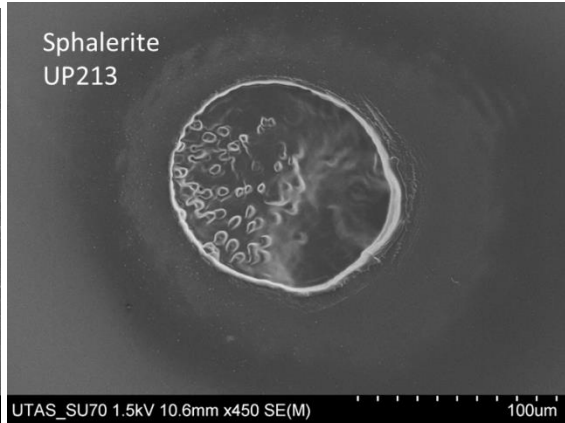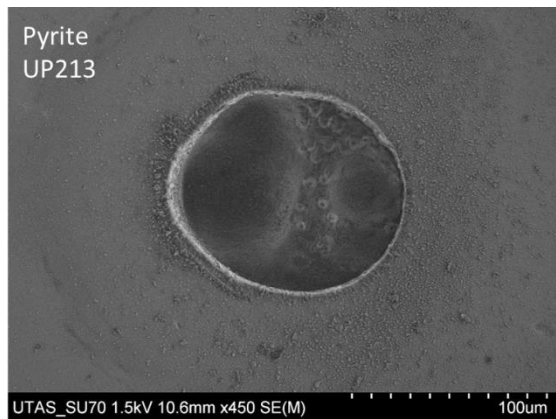

Supplement: c4ja00012a2.pdf [file c4ja00012a2.pdf]
