# Supplementary material for: Fractionation of sulphur relative to iron during laser ablation-ICP-MS analyses of sulphide minerals: implications for quantification
Source: Royal Society of Chemistry journal article supplement (doi:10.1039/c4ja00012a), 2014-01-01
Supplement: c4ja00012a1.pdf [file c4ja00012a1.pdf]

Depth Profiles in each mineral measured with a Wyko NT 9100 optical profiler (Veeco, NY, USA).

**Bornite 193-Exi**

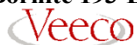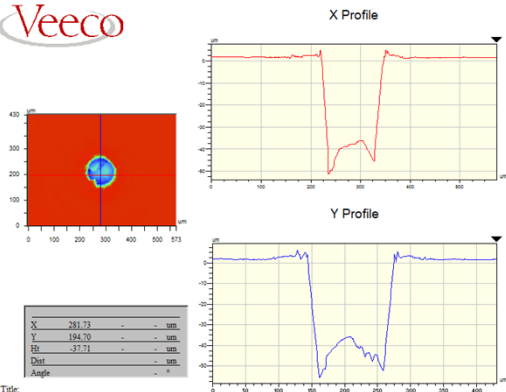

Title:

**Pyrrhotite 193-Exi**

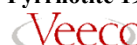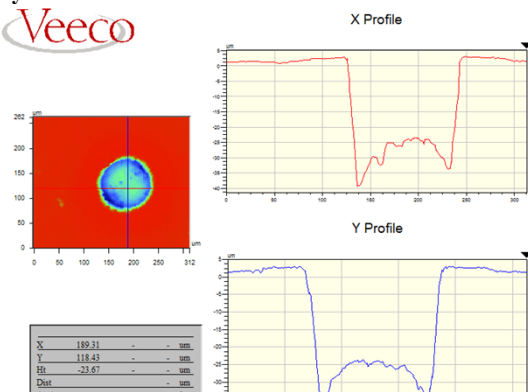

Title: Subregion

**Chalcopyrite 193-Exi**

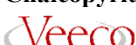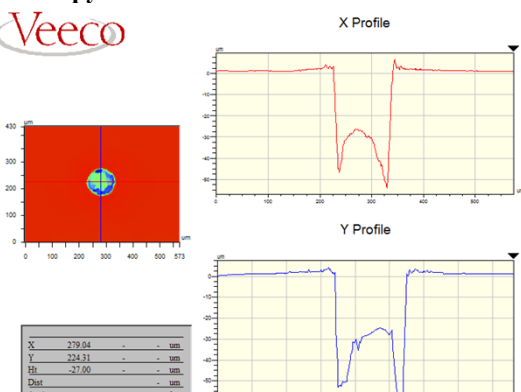

Title:

Note:

**Sphalerite 193-Exi**

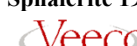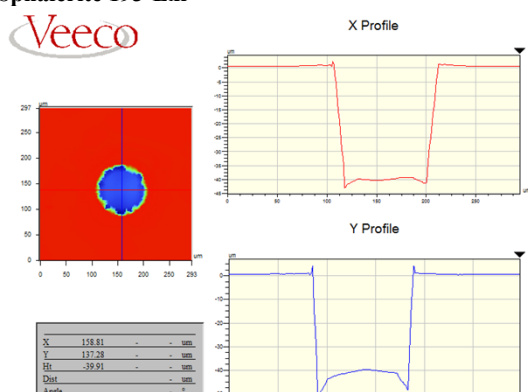

Title: Subregion

**Pentlandite 193-Exi**

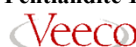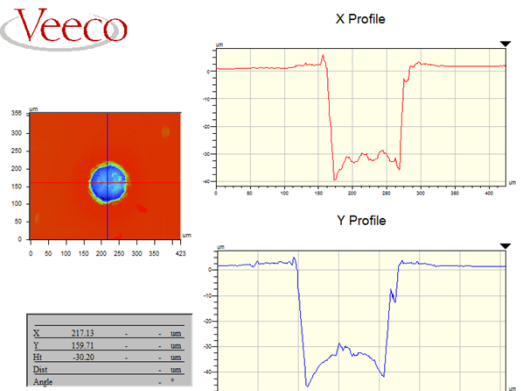

Title: Subregion

**Tetrahedrite 193-Ex**

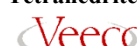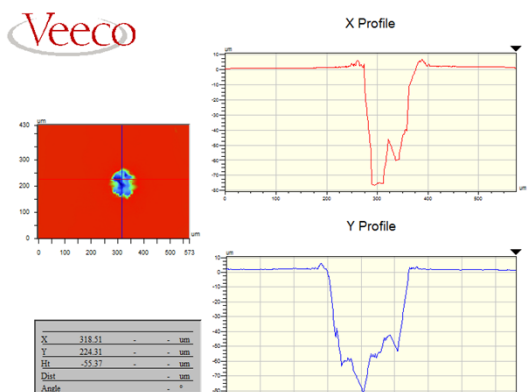

Title:

**Pyrite 193-Exi**

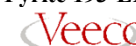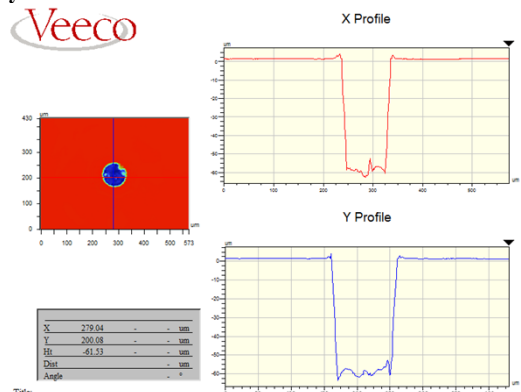

Title:

### Bornite UP213

Veeco

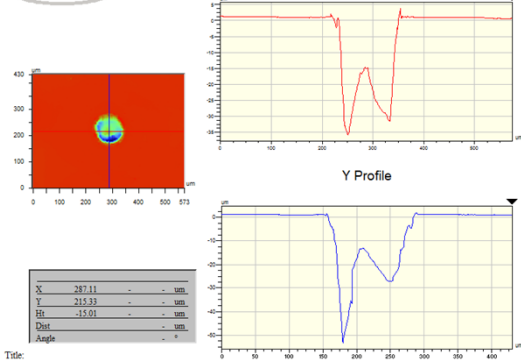

Title:

### Chalcopyrite UP213

Veeco

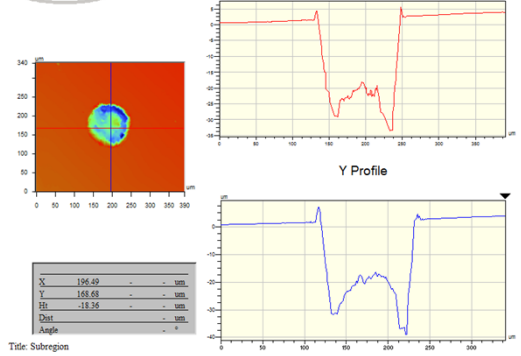

Title: Subregion

### Pentlandite UP213

Veeco

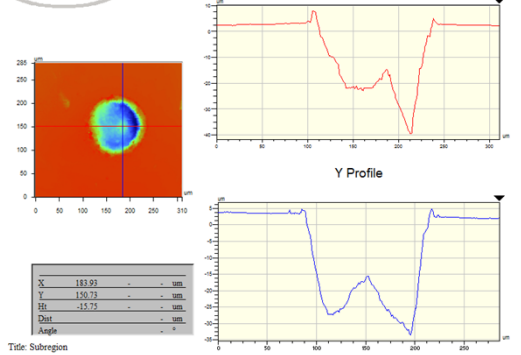

Title: Subregion

### Pyrite UP213

Veeco

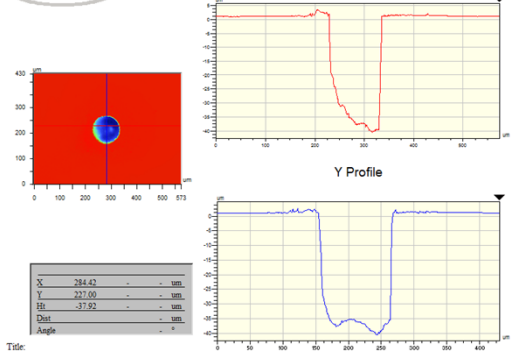

Title:

### Pyrrhotite UP213

Veeco

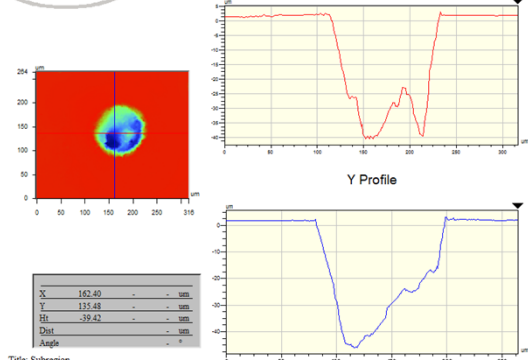

Title: Subregion

### Sphalerite UP213

Veeco

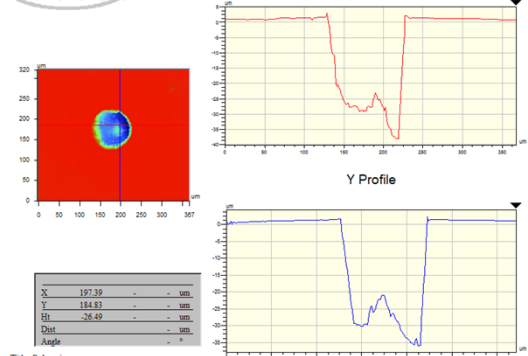

Title: Subregion

### Tetrahedrite UP213

Veeco

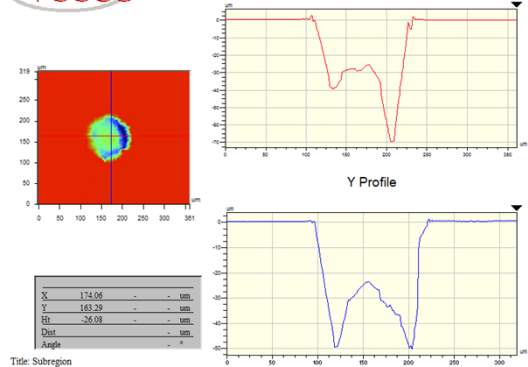

Title: Subregion
