# Supplementary material for: Fractionation of sulphur relative to iron during laser ablation-ICP-MS analyses of sulphide minerals: implications for quantification
Source: Royal Society of Chemistry journal article supplement (doi:10.1039/c4ja00012a), 2014-01-01
Supplement: c4ja00012a3.xlsx [file c4ja00012a3.xlsx]

## Sheet: Sheet1
Analytical Conditions for electron microbrobe analyses
Cameca SX100
Central Science Laboratory, University of Tasmania
Beam Diameter: 2 micron
Accelerating voltage: 20 kV
Beam Current: 15 nA
				Interference corrections were applied where applicable to:
Element	X-ray Line	Standard		Element corrected	Interference from	Mineral analysed
Ag	Lα	Acanthite Ag2S		As	Sb	tetrahedrite
As	Lα	Gallium Arsenide (Astimex)		Sb	Te	tetrahedrite
Cd	Lα	Greenockite CdS		Te	Sb & Ag	tetrahedrite
Co	Kα	Co metal		Co	Fe	pyrite
Cu	Kα	Chalcopyrite CuFeS2		Fe	Mn	sphalerite
Fe	Kα	Marcasite (Astimex)
Mn	Kα	Bustamite (Astimex)
Ni	Kα	Pentlandite (Astimex)
S	Kα	Marcasite (Astimex)
Sb	Lα	Stibnite (Astimex)
Te	Lα	Bismuth telluride Bi2Te3
Zn	Kα	Sphalerite (Astimex)
Off Peak correction method:
Linear for Cu, Fe, Zn, Ag, Sb, Ni, Mn & Cd
Exponential for S & As
Slope (Hi) for Te & Co
