# Supplementary material for: Fractionation of sulphur relative to iron during laser ablation-ICP-MS analyses of sulphide minerals: implications for quantification
Source: Royal Society of Chemistry journal article supplement (doi:10.1039/c4ja00012a), 2014-01-01
Supplement: c4ja00012a4.pdf [file c4ja00012a4.pdf]

**Major element concentrations (wt%) of sulphide minerals analysed by Electron Microprobe and LA-ICP-MS.** All LA-ICP-MS analyses for S are quantified relative to the pyrite reference material using Fe as the internal standard element and laser conditions listed in Table 1. Other elements quantified using the same analytical conditions and the STDGL2b2 in-house reference material with Fe as the internal standard element. Note, Sb not analysed with the 193-Ex laser.

| Mineral      | Electron Microprobe |      | Sulphur by LA-ICP-MS |        |       |
|--------------|---------------------|------|----------------------|--------|-------|
|              | Fe                  | S    | UP213                | 193-Ex | UP193 |
| Pyrite       | 46.3                | 53.7 | 53.5                 | 53.5   | 53.5  |
| Co-Pyrite    | 45.1                | 53.6 | 56.8                 | 54.2   |       |
| Pyrrhotite   | 61.0                | 39.0 | 47.8                 | 47.0   | 43.3  |
| Sphalerite   | 6.8                 | 33.3 | 37.5                 | 33.0   |       |
| Pentlandite  | 29.6                | 33.4 | 43.1                 | 35.7   |       |
| Chalcopyrite | 29.9                | 35.1 | 47.5                 | 45.8   |       |
| Bornite      | 11.1                | 26.2 | 34.8                 | 34.6   | 29.8  |
| Tetrahedrite | 5.5                 | 25.5 | 37.7                 | 31.4   |       |

| Mineral      | Electron Microprobe                        | LA-ICP-MS                                |                                   |
|--------------|--------------------------------------------|------------------------------------------|-----------------------------------|
|              | Other elements                             | UP213                                    | 193-Ex                            |
| Co-Pyrite    | 1.50 (Co)                                  | 1.5 (Co)                                 | 1.7 (Co)                          |
| Sphalerite   | 59.1 (Zn)                                  | 96.8 (Zn)                                | 88.1 (Zn)                         |
| Pentlandite  | 0.5 (Co), 35.6 (Ni)                        | 0.5 (Co)<br>34.8 (Ni)                    | 0.5 (Co)<br>34.7 (Ni)             |
| Chalcopyrite | 34.7 (Cu)                                  | 33.2 (Cu)                                | 36.4 (Cu)                         |
| Bornite      | 63.3 (Cu)                                  | 60.4 (Cu)                                | 63.7 (Cu)                         |
| Tetrahedrite | 36.2 (Cu), 1.4 (Zn)<br>2.6 (Ag), 29.2 (Sb) | 35.5 (Cu) 2.9 (Zn)<br>4.1 (Ag) 35.1 (Sb) | 36.8 (Cu)<br>2.7 (Zn)<br>3.9 (Ag) |
